# Supplementary material for: The Ewing Amputation: The First Human Implementation of the Agonist-Antagonist Myoneural Interface
Source: PubMed Central journal article supplement — Plast Reconstr Surg Glob Open. 2018 Nov 16;6(11):e1997. doi: 10.1097/GOX.0000000000001997 (PMC6414116; doi:10.1097/gox.0000000000001997), 2018-11-16
Supplement: gox-6-e1997-s001.pdf [file gox-6-e1997-s001.pdf]

## Modified Amputation Rehabilitation Protocol Overview (Initial 3 Months)

|                                   |                                                                                                            | Week                                                  |                            |   |   |                                                                                                                                                                                                       |   |   |   |                                                                                                                                                                                                                                                                         |                             |                                                                                                                                                                |    |                                                                                                                                                                                                                                                                                                                                                                       |  |  |  |
|-----------------------------------|------------------------------------------------------------------------------------------------------------|-------------------------------------------------------|----------------------------|---|---|-------------------------------------------------------------------------------------------------------------------------------------------------------------------------------------------------------|---|---|---|-------------------------------------------------------------------------------------------------------------------------------------------------------------------------------------------------------------------------------------------------------------------------|-----------------------------|----------------------------------------------------------------------------------------------------------------------------------------------------------------|----|-----------------------------------------------------------------------------------------------------------------------------------------------------------------------------------------------------------------------------------------------------------------------------------------------------------------------------------------------------------------------|--|--|--|
|                                   |                                                                                                            | Pre-Intervention                                      | 1                          | 2 | 3 | 4                                                                                                                                                                                                     | 5 | 6 | 7 | 8                                                                                                                                                                                                                                                                       | 9                           | 10                                                                                                                                                             | 11 | 12                                                                                                                                                                                                                                                                                                                                                                    |  |  |  |
| <b>Weight Bearing</b>             | WBAT                                                                                                       | NWB: maintain full knee extension in knee immobilizer |                            |   |   | WBAT: begin CKC (quadruped, high kneeling) if wound is fully healed; ROMAT                                                                                                                            |   |   |   | FWB: prosthesis training                                                                                                                                                                                                                                                |                             |                                                                                                                                                                |    |                                                                                                                                                                                                                                                                                                                                                                       |  |  |  |
| <b>Splinting</b>                  |                                                                                                            | Knee Immobilizer                                      |                            |   |   | No splinting needs: ROMAT                                                                                                                                                                             |   |   |   |                                                                                                                                                                                                                                                                         |                             |                                                                                                                                                                |    |                                                                                                                                                                                                                                                                                                                                                                       |  |  |  |
| <b>Pain Management</b>            |                                                                                                            | Acetaminophen, ibuprofen, oxycodone PRN               |                            |   |   |                                                                                                                                                                                                       |   |   |   | Neurodynamics                                                                                                                                                                                                                                                           |                             |                                                                                                                                                                |    |                                                                                                                                                                                                                                                                                                                                                                       |  |  |  |
| <b>Wound/Scar Management</b>      |                                                                                                            | Daily Xeroform and compressive dressing changes       |                            |   |   | Remove sutures, monitor for evidence of infection                                                                                                                                                     |   |   |   |                                                                                                                                                                                                                                                                         |                             | Initial scar massage after full wound healing; communicate with prosthetist for any fit issues to resolve as soon as possible to minimize integument breakdown |    |                                                                                                                                                                                                                                                                                                                                                                       |  |  |  |
| <b>Prosthesis</b>                 |                                                                                                            |                                                       |                            |   |   | Shrinker                                                                                                                                                                                              |   |   |   | Standard prosthesis fitting                                                                                                                                                                                                                                             |                             |                                                                                                                                                                |    |                                                                                                                                                                                                                                                                                                                                                                       |  |  |  |
| <b>Strengthening/Conditioning</b> | Core; UE strengthening; hip strengthening                                                                  | Continue hip and core HEP                             |                            |   |   | UE strength/conditioning; therex for hip/knee strength (SLR 4 ways, quad/adductor/glut sets; unilateral bridges (progress bridges to foam roller/physioball); modified side and front planks          |   |   |   | High kneeling (progress to compliant surface); quadruped activities; modified plank progressions, modified physioball activities for UE/core strength                                                                                                                   |                             |                                                                                                                                                                |    |                                                                                                                                                                                                                                                                                                                                                                       |  |  |  |
| <b>Stretching/Joint Mobility</b>  |                                                                                                            |                                                       |                            |   |   | Hip/knee mobility; hamstring/hip flexor/gastroc stretching                                                                                                                                            |   |   |   | Seated BAPS and wobble board for residual limb mirroring; manual therapy for scar tissue, hip/knee mobility                                                                                                                                                             |                             |                                                                                                                                                                |    |                                                                                                                                                                                                                                                                                                                                                                       |  |  |  |
| <b>Balance Training</b>           |                                                                                                            | NWB gait training                                     |                            |   |   | Pregait training                                                                                                                                                                                      |   |   |   | Prosthesis training, WBAT                                                                                                                                                                                                                                               |                             |                                                                                                                                                                |    | Progress gait training with prosthetic and assistive devices as needed to minimize gait deviations/normalize gait; Balance and proprioceptive training with prosthesis, with stimulation to residual limb activation (wobble boards, BAPS, therex) static and dynamic, in various stances (wide/narrow BOS, modified tandem, tandem), and progressing towards agility |  |  |  |
| <b>Cognitive Training</b>         | Body scan: for pelvis, hip knee and ankle position (pelvic tilts, shifts, hip rotation, ankle PF/DF/IV/EV) |                                                       |                            |   |   | PT supervised body scan with construct activation; NO desensitization to the residual limb; sensory exercise for right/left ankle rest position; continue body scans; motor exercises for PF/DF/IV/EV |   |   |   | Initiate home program with construct activation (both sensory and motor exercises); progress active DF/PF/IV/EV activation to 40-60 seconds, up to 6 reps (emphasis on moderate consistent contraction with low reps to decrease possibility of friction on constructs) |                             |                                                                                                                                                                |    |                                                                                                                                                                                                                                                                                                                                                                       |  |  |  |
| <b>Goals</b>                      | Optimize hip/knee strength and ROM                                                                         | Maintain core strength and hip ROM                    |                            |   |   | Maintain/improve LE strength; mobility in preparation for prosthesis training                                                                                                                         |   |   |   | Prepare pt for WBAT; improve proprioception through residual limb and construct awareness                                                                                                                                                                               |                             |                                                                                                                                                                |    | Monitor prosthetic fit as residual limb size increased with muscle bulk; Continue to monitor pain levels, scar tissue/soft tissue integrity, neural sensitivity                                                                                                                                                                                                       |  |  |  |
| <b>Setting/Frequency</b>          | Outpatient/HEP                                                                                             | Inpatient: Daily                                      | Home program: No formal PT |   |   | Outpatient: 2-3x per week                                                                                                                                                                             |   |   |   |                                                                                                                                                                                                                                                                         | Outpatient: 1x per week/PRN |                                                                                                                                                                |    |                                                                                                                                                                                                                                                                                                                                                                       |  |  |  |
